# Supplementary material for: Gene Duplication and Differential Expression of Flower Symmetry Genes in Rhododendron (Ericaceae)
Source: MDPI journal article supplement (doi:10.3390/plants10101994), 2021-09-23
Supplement: s1 [file s1]

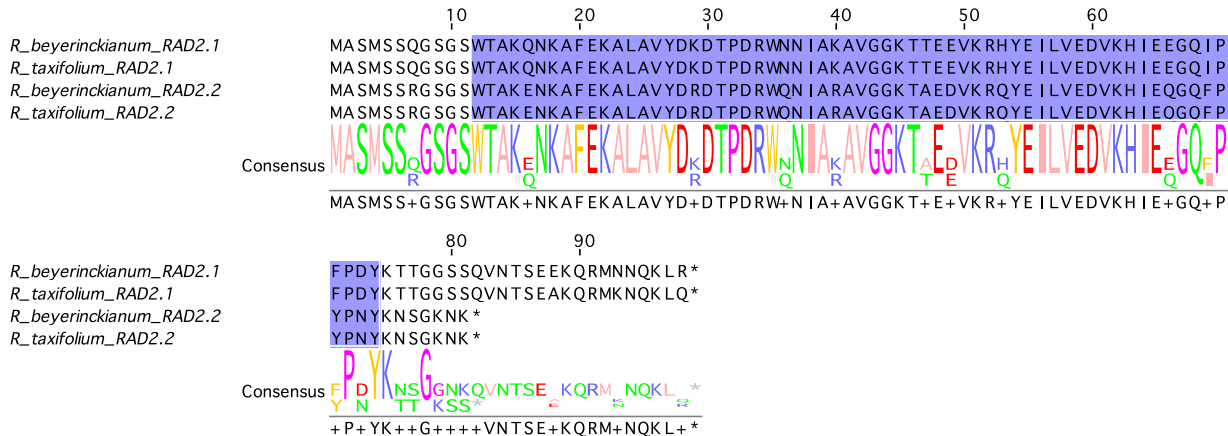

**Supplementary Figure S3. Protein alignment of *RADIALIS* (*RAD*) orthologs from *Rhododendron* sect. *Schistanthe*.**  
 MYBI domain highlighted in blue.
