# Supplementary material for: Gene Duplication and Differential Expression of Flower Symmetry Genes in Rhododendron (Ericaceae)
Source: MDPI journal article supplement (doi:10.3390/plants10101994), 2021-09-23
Supplement: s1 [file s1]

**Supplementary Table S1. *Rhododendron* samples and outgroups collected for this study.**

| <b>Taxon</b>                    | <b>Collection locality</b>                                                                                           | <b>Herbarium voucher<br/>(Herbarium)</b> |
|---------------------------------|----------------------------------------------------------------------------------------------------------------------|------------------------------------------|
| <i>R. beyerinckianum</i> Koord. | Rhododendron Species<br>Botanical Garden, Federal<br>Way, WA, USA, accession<br>1985/047                             | Soza et al. 1926 & 1933<br>(WTU)         |
| <i>R. camtschaticum</i> Pall.   | Rhododendron Species<br>Botanical Garden, Federal<br>Way, WA, USA, accession<br>1977/080                             | Soza & Ramage 1934<br>(WTU)              |
| <i>R. edgeworthii</i> Hook. f.  | Rhododendron Species<br>Botanical Garden, Federal<br>Way, WA, USA, accession<br>2001/229                             | Soza 1958 (WTU)                          |
| <i>R. meliphagidum</i> J.J.Sm.  | Royal Botanic Garden<br>Edinburgh, UK, accession<br>19880517                                                         | Conlon C114 (E)                          |
| <i>R. taxifolium</i> Merr.      | Rhododendron Species<br>Botanical Garden, Federal<br>Way, WA, USA, accession<br>2013/241                             | Soza & Ramage 1954<br>(WTU)              |
| <i>Empetrum nigrum</i> L.       | University of Washington<br>Medicinal Herb Garden,<br>Seattle, WA, USA                                               | Soza 1957 (WTU)                          |
| <i>Erica scoparia</i> L.        | University of Washington<br>Botanic Gardens,<br>Washington Park<br>Arboretum, Seattle, WA,<br>USA, accession 303-81  | N/A                                      |
| <i>Kalmia latifolia</i> L.      | University of Washington<br>Botanic Gardens,<br>Washington Park<br>Arboretum, Seattle, WA,<br>USA, accession 1054-40 | Herbarium Committee 1935<br>(WTUH)       |

**Supplementary Table S2. Sources of DNA sequences used in this study.**

GenBank accessions numbers indicated below unless otherwise noted by footnotes.

| <b>Taxon</b>                            | <b>CYC1</b>            | <b>CYC2</b>                                                                                                         | <b>CYC3</b>      | <b>RAD1/3*</b>   | <b>RAD2</b>                                 | <b>DIV1</b>                                 | <b>DIV2</b>      | <b>DIV3</b>        | <b>ACT5</b>      |
|-----------------------------------------|------------------------|---------------------------------------------------------------------------------------------------------------------|------------------|------------------|---------------------------------------------|---------------------------------------------|------------------|--------------------|------------------|
| <i>R. beyerinckianum</i>                | N/A                    | CYC2.1:<br>MZ208772;<br>CYC2.2:<br>MZ208773;<br>CYC2.3:<br>MZ208774;<br>CYC2.4:<br>MZ208775;<br>CYC2.5:<br>MZ208776 | N/A              | N/A              | RAD2.1:<br>MZ209225;<br>RAD2.2:<br>MZ209233 | DIV1.1:<br>MZ209241;<br>DIV1.2:<br>MZ209249 | N/A              | N/A                |                  |
| <i>R. camtschaticum</i>                 | N/A                    | CYC2.1:<br>MZ208777;<br>CYC2.2:<br>MZ208778;<br>CYC2.3:<br>MZ208779                                                 | N/A              | N/A              | RAD2.1:<br>MZ209227;<br>RAD2.2:<br>MZ209235 | DIV1.1:<br>MZ209243;<br>DIV1.2:<br>MZ209251 | N/A              | N/A                | N/A              |
| <i>R. delavayi</i> Franch. <sup>1</sup> | CYC1.1:<br>scaffold387 | CYC2.1:<br>scaffold376                                                                                              | scaffold247<br>8 | scaffold571<br>0 | RAD2.1:<br>scaffold9                        | DIV1.1:<br>scaffold119                      | scaffold2<br>143 | scaffold287<br>210 | scaffold420<br>8 |

|                       |                                                                                                                                  |                                                                                                                                                                                                                        |                   |                                                                                                                                                                                            |                                                                   |                                                                             |                 |                                                               |                   |
|-----------------------|----------------------------------------------------------------------------------------------------------------------------------|------------------------------------------------------------------------------------------------------------------------------------------------------------------------------------------------------------------------|-------------------|--------------------------------------------------------------------------------------------------------------------------------------------------------------------------------------------|-------------------------------------------------------------------|-----------------------------------------------------------------------------|-----------------|---------------------------------------------------------------|-------------------|
|                       | 7<br>(DUH02393<br>2.1);<br>CYC1.2:<br>scaffold107<br>8<br>(DUH00097<br>8.1);<br>CYC1.3:<br>scaffold660<br>5<br>(DUH02912<br>0.1) | 1<br>(DUH02354<br>4.1);<br>CYC2.2:<br>scaffold376<br>1<br>(DUH02354<br>5.1);<br>CYC2.3:<br>scaffold376<br>1<br>(DUH02354<br>6.1);<br>CYC2.4:<br>scaffold376<br>1<br>(DUH02354<br>7.1);<br>CYC2.5:<br>scaffold225<br>92 | (DUH00884<br>0.1) | (DUH02755<br>5.2,<br>DUH02754<br>8.1),<br>scaffold682<br>3<br>(DUH02944<br>9.1),<br>scaffold287<br>816<br>(DUH02005<br>1.1),<br>scaffold600<br>3<br>(DUH02787<br>0.1),<br>scaffold571<br>0 | (DUH032037.<br>1);<br>RAD2.2:<br>scaffold314<br>(DUH022018.<br>1) | 9<br>(DUH00188<br>1.1);<br>DIV1.2:<br>scaffold218<br>4<br>(DUH00769<br>5.1) | (DUH00<br>7400) | (DUH01316<br>8.2),<br>scaffold287<br>745<br>(DUH01883<br>3.1) | (DUH02526<br>9.1) |
| <i>R. edgeworthii</i> | N/A                                                                                                                              | CYC2.1:                                                                                                                                                                                                                | N/A               | N/A                                                                                                                                                                                        | RAD2.1:                                                           | DIV1.1:                                                                     | N/A             | N/A                                                           | N/A               |

|                                       |                           |                                                                                                                                  |                             |                             |                                             |                                             |                               |                             |     |
|---------------------------------------|---------------------------|----------------------------------------------------------------------------------------------------------------------------------|-----------------------------|-----------------------------|---------------------------------------------|---------------------------------------------|-------------------------------|-----------------------------|-----|
|                                       |                           | MZ208780;<br>CYC2.2:<br>MZ208781;<br>CYC2.3:<br>MZ208782;<br>CYC2.4:<br>MZ208783;<br>CYC2.5:<br>MZ208784;<br>CYC2.6:<br>MZ208785 |                             |                             | MZ209228;<br>RAD2.2:<br>MZ209236            | MZ209244;<br>DIV1.2:<br>MZ209252            |                               |                             |     |
| <i>R. meliphagidum</i>                | N/A                       | CYC2.1:<br>MZ208786;<br>CYC2.2:<br>MZ208787;<br>CYC2.3:<br>MZ208788;<br>CYC2.4:<br>MZ208789                                      | N/A                         | N/A                         | RAD2.1:<br>MZ209229;<br>RAD2.2:<br>MZ209237 | DIV1.1:<br>MZ209245;<br>DIV1.2:<br>MZ209253 | N/A                           | N/A                         | N/A |
| <i>R. simsii</i> Planch. <sup>2</sup> | CYC1.1:<br>CM024964.<br>1 | CYC2.1:<br>CM024962.<br>1                                                                                                        | CM024961.<br>1<br>(Rhsim09G | CM024958.<br>1<br>(Rhsim06G | RAD2.1:<br>CM024963.1<br>(Rhsim11G017       | DIV1.1:<br>CM024953.<br>1                   | CM0249<br>57.1(Rhsi<br>m05G02 | CM024961.<br>1<br>(Rhsim09G | N/A |

|                      |                                                                              |                                                                                                                                                                                                                       |          |                                                                                                                                              |                                                         |                                                                            |        |                                                      |  |
|----------------------|------------------------------------------------------------------------------|-----------------------------------------------------------------------------------------------------------------------------------------------------------------------------------------------------------------------|----------|----------------------------------------------------------------------------------------------------------------------------------------------|---------------------------------------------------------|----------------------------------------------------------------------------|--------|------------------------------------------------------|--|
|                      | (Rhsim12G<br>0144800);<br>CYC1.2:<br>CM024960.<br>1<br>(Rhsim08G<br>0137600) | (Rhsim10G<br>0063600);<br>CYC2.2:<br>CM024962.<br>1; CYC2.3:<br>CM024962.<br>1<br>(Rhsim10G<br>0063800);<br>CYC2.4:<br>CM024962.<br>1<br>(Rhsim10G<br>0063900);<br>CYC2.5:<br>CM024962.<br>1<br>(Rhsim10G<br>0064000) | 0112900) | 0128900),<br>CM024958.<br>1<br>(Rhsim06G<br>0032200),<br>CM024959.<br>1<br>(Rhsim07G<br>0240600),<br>CM024959.<br>1<br>(Rhsim07G<br>0239900) | 7900);<br>RAD2.2:<br>CM024957.1<br>(Rhsim05G007<br>3900 | (Rhsim01G<br>0235000);<br>DIV1.2<br>CM024965.<br>1<br>(Rhsim13G<br>0072600 | 06600) | 0172100),<br>CM024955.<br>1<br>(Rhsim03G<br>0139800) |  |
| <i>R. taxifolium</i> | N/A                                                                          | CYC2.1:<br>MZ208790;                                                                                                                                                                                                  | N/A      | N/A                                                                                                                                          | RAD2.1:<br>MZ209226;                                    | DIV1.1:<br>MZ209242;                                                       | N/A    | N/A                                                  |  |

|                                                                 |                                                                                                                                             |                                                                                                                                                                                                |                                                          |                                                                                                                                                                                                    |                                                                                                                                    |                                                                                                                                           |                                                                   |                                                                                                                       |                                                          |
|-----------------------------------------------------------------|---------------------------------------------------------------------------------------------------------------------------------------------|------------------------------------------------------------------------------------------------------------------------------------------------------------------------------------------------|----------------------------------------------------------|----------------------------------------------------------------------------------------------------------------------------------------------------------------------------------------------------|------------------------------------------------------------------------------------------------------------------------------------|-------------------------------------------------------------------------------------------------------------------------------------------|-------------------------------------------------------------------|-----------------------------------------------------------------------------------------------------------------------|----------------------------------------------------------|
|                                                                 |                                                                                                                                             | CYC2.2:<br>MZ208791;<br>CYC2.3:<br>MZ208792;<br>CYC2.4:<br>MZ208793                                                                                                                            |                                                          |                                                                                                                                                                                                    | RAD2.2:<br>MZ209234                                                                                                                | DIV1.2:<br>MZ209250                                                                                                                       |                                                                   |                                                                                                                       |                                                          |
| <i>R. williamsianum</i><br>Rehder & E.H.<br>Wilson <sup>3</sup> | CYC1.2:<br>LG01_order<br>ed_scaffold<br>_52<br>(C3L33_00<br>958-RA);<br>CYC1.1:<br>unclustered<br>_scaffold_7<br>97<br>(C3L33_23<br>136-RA) | CYC2.1:<br>LG11_order<br>ed_scaffold<br>_106<br>(C3L33_18<br>671-RA);<br>CYC2.2:<br>LG11_order<br>ed_scaffold<br>_106<br>(C3L33_18<br>672-RA);<br>CYC2.3:<br>LG11_order<br>ed_scaffold<br>_107 | LG10_order<br>ed_scaffold<br>_29<br>(C3L33_17<br>041-RA) | LG06_order<br>ed_scaffold<br>_66,<br>LG06_order<br>ed_scaffold<br>_126<br>(C3L33_11<br>058-RA),<br>LG05_order<br>ed_scaffold<br>_118<br>(C3L33_09<br>508-RA),<br>LG05_order<br>ed_scaffold<br>_118 | RAD2.1:<br>LG13_ordered<br>_scaffold_4<br>(C3L33_20823<br>-RA);<br>RAD2.2:<br>LG12_ordered<br>_scaffold_33<br>(C3L33_19524<br>-RA) | DIV1.1:<br>LG03_order<br>ed<br>scaffol_14<br>(C3L33_04<br>512-RA);<br>DIV1.2:<br>LG04_order<br>ed_scaffold<br>_90<br>(C3L33_07<br>065-RA) | LG12_or<br>dered_sc<br>affold_11<br>0<br>(C3L33_<br>20406-R<br>A) | LG10_order<br>ed_scaffold<br>_14<br>(C3L33_16<br>627-RA),<br>LG02_order<br>ed_scaffold<br>_91<br>(C3L33_02<br>859-RA) | LG02_order<br>ed_scaffold<br>_83<br>(C3L33_02<br>818-RA) |

|                                                    |                                |                                                                                                                                          |                            |                           |                                                                      |                                                                                                                                                                                                |     |     |     |
|----------------------------------------------------|--------------------------------|------------------------------------------------------------------------------------------------------------------------------------------|----------------------------|---------------------------|----------------------------------------------------------------------|------------------------------------------------------------------------------------------------------------------------------------------------------------------------------------------------|-----|-----|-----|
|                                                    |                                | (C3L33_18<br>673-RA)                                                                                                                     |                            | (C3L33_09<br>514-RA)      |                                                                      |                                                                                                                                                                                                |     |     |     |
| <i>Actinidia chinensis</i><br>Planch. <sup>4</sup> | N/A                            | Contig0117<br>7<br>(Actinidia24<br>782),<br>Lachesis_gr<br>oup4<br>(Actinidia36<br>307),<br>Lachesis_gr<br>oup11<br>(Actinidia18<br>122) | N/A                        | N/A                       | Lachesis_grou<br>p7,<br>Lachesis_grou<br>p12<br>(Actinidia0052<br>9) | Lachesis_gr<br>oup15<br>(Actinidia3<br>4447),<br>Lachesis_gr<br>oup9<br>(Actinidia2<br>3898),<br>Lachesis_gr<br>oup24<br>(Actinidia3<br>8831),<br>Lachesis_gr<br>oup20<br>(Actinidia2<br>5144) | N/A | N/A | N/A |
| <i>Antirrhinum majus</i> L. <sup>5</sup>           | TCP5: Chr5<br>(Am05g302<br>60) | CYC:<br>Y16313;<br>DICH:                                                                                                                 | TCP1:<br>Chr3<br>(Am03g341 | RADLI:<br>AJ791699.1<br>; | RAD:<br>AY954971.1                                                   | DIV:<br>AY077453.<br>1;                                                                                                                                                                        | N/A | N/A | N/A |

|                                                   |                                                                             |                                  |                                |                                                                                                                                       |                                                        |                                 |     |     |     |
|---------------------------------------------------|-----------------------------------------------------------------------------|----------------------------------|--------------------------------|---------------------------------------------------------------------------------------------------------------------------------------|--------------------------------------------------------|---------------------------------|-----|-----|-----|
|                                                   |                                                                             | AF199465                         | 20)                            | <i>RADL2:</i><br>Am05g0229<br>0<br><i>RADL3:</i><br>DQ375227.<br>1;<br><i>RADL4:</i><br>Am07g1081<br>0<br><i>RADL5:</i><br>AJ793240.1 |                                                        | <i>DIVL1:</i><br>AY077454.<br>1 |     |     |     |
| <i>Aquilegia caerulea</i><br>E.James <sup>6</sup> | <i>CYC1:</i><br>Aqcoe3G39<br>5500.1;<br><i>CYC2:</i><br>Aqcoe3G04<br>8600.1 | N/A                              | N/A                            | N/A                                                                                                                                   | N/A                                                    | N/A                             | N/A | N/A | N/A |
| <i>Arabidopsis thaliana</i><br>(L.) Heynh.        | <i>TCP18:</i><br>NM_11274<br>1                                              | <i>TCP1:</i><br>NM_00116<br>0982 | <i>TCP12:</i><br>NM_10555<br>4 | <i>RL3:</i><br>NM_11982<br>0; <i>RL4:</i><br>NM_00108                                                                                 | <i>RL1:</i><br>NM_120086;<br><i>RL2</i><br>(NM_127736) | N/A                             | N/A | N/A | N/A |



|                                                |     |          |     |                                                                             |                                             |                                                  |     |     |     |
|------------------------------------------------|-----|----------|-----|-----------------------------------------------------------------------------|---------------------------------------------|--------------------------------------------------|-----|-----|-----|
|                                                |     |          |     | 4443;<br><i>RL5</i> :<br>NM_10180<br>8;<br><i>RL6</i> :<br>NM_00108<br>4356 |                                             |                                                  |     |     |     |
| <i>Empetrum nigrum</i>                         | N/A | MZ208769 | N/A | N/A                                                                         | RAD2.1:<br>MZ209230;<br>RAD2.2:<br>MZ209238 | DIV1.1:<br>MZ209246;<br>DIV1.2:<br>MZ209254      | N/A | N/A | N/A |
| <i>Erica scoparia</i>                          | N/A | MZ208770 | N/A | N/A                                                                         | RAD2.1:<br>MZ209231;<br>RAD2.2:<br>MZ209239 | DIV1.1:<br>MZ209247;<br>DIV1.2:<br>MZ209255      | N/A | N/A | N/A |
| <i>Kalmia latifolia</i>                        | N/A | MZ208771 | N/A | N/A                                                                         | RAD2.1:<br>MZ209232;<br>RAD2.2:<br>MZ209240 | DIV1.1:<br>MZ209248;<br>DIV1.2:<br>MZ209256      | N/A | N/A | N/A |
| <i>Magnolia grandiflora</i><br>L. <sup>7</sup> | N/A | N/A      | N/A | <i>RAD1</i> :<br>WBOD-208<br>6252;                                          | N/A                                         | <i>DIV1</i> :<br>WBOD-202<br>2953; <i>DIV2</i> : | N/A | N/A | N/A |

|                                                 |                                                                                       |                                                                                       |                                                                                       |                                                                                                                                                                                 |                                                                                     |                                        |                                                                                              |                                                                                       |     |
|-------------------------------------------------|---------------------------------------------------------------------------------------|---------------------------------------------------------------------------------------|---------------------------------------------------------------------------------------|---------------------------------------------------------------------------------------------------------------------------------------------------------------------------------|-------------------------------------------------------------------------------------|----------------------------------------|----------------------------------------------------------------------------------------------|---------------------------------------------------------------------------------------|-----|
|                                                 |                                                                                       |                                                                                       |                                                                                       | <i>RAD2</i> :<br>WBOD-201<br>9537;<br><i>RAD3</i> :<br>WBOD-200<br>6094                                                                                                         |                                                                                     | WBOD-202<br>4364                       |                                                                                              |                                                                                       |     |
| <i>Solanum lycopersicum</i><br>L. <sup>6</sup>  | <i>CYC1A</i> :<br>Solyc03g11<br>9770.2.1;<br><i>CYC1B</i> :<br>Solyc06g06<br>9240.1.1 | <i>CYC2A</i> :<br>Solyc02g08<br>9830.1.1;<br><i>CYC2B</i> :<br>Solyc03g04<br>5030.1.1 | <i>CYC3A</i> :<br>Solyc05g00<br>9900.1.1;<br><i>CYC3B</i> :<br>Solyc04g00<br>6980.1.1 | <i>RADL5</i> :<br>Solyc10g08<br>0920.1.1;<br><i>RADL3</i> :<br>Solyc04g08<br>0500.2.1;<br><i>RADL4</i> :<br>Solyc12g08<br>9190.1.1;<br><i>RADL1</i> :<br>Solyc01g10<br>9690.1.1 | <i>RAD</i> :<br>Solyc01g1096<br>70.2.1;<br><i>RADL2</i> :<br>Solyc10g0524<br>70.1.1 | <i>DIV</i> :<br>Solyc06g07<br>6770.2.1 | <i>DIVL</i> :<br>Solyc09g<br>014250.2<br>.1;<br><i>DIVL2</i> :<br>Solyc10g<br>076820.1<br>.1 | <i>DIVL4</i> :<br>Solyc03g09<br>6350.2.1;<br><i>DIVL5</i> :<br>Solyc05g05<br>2610.2.1 | N/A |
| <i>Vaccinium<br/>corymbosum</i> L. <sup>8</sup> | N/A                                                                                   | VaccDscf<br>7-snap-gene<br>-330.28,                                                   | N/A                                                                                   | N/A                                                                                                                                                                             | VaccDscf14-<br>gene-372.36,<br>VaccDscf2-s                                          | VaccDscf<br>19-augustus<br>-gene-360.1 | N/A                                                                                          | N/A                                                                                   | N/A |

|                                       |                       |                                                                          |                       |                                                            |                                                                                                                                                                                             |                                                                                                                                              |                                             |                                         |     |
|---------------------------------------|-----------------------|--------------------------------------------------------------------------|-----------------------|------------------------------------------------------------|---------------------------------------------------------------------------------------------------------------------------------------------------------------------------------------------|----------------------------------------------------------------------------------------------------------------------------------------------|---------------------------------------------|-----------------------------------------|-----|
|                                       |                       | VaccDscf<br>16-snap-gen<br>e-95.39,<br>VaccDscf<br>31-snap-gen<br>e-5.36 |                       |                                                            | nap-gene-426.<br>30,<br>VaccDscf13-<br>snap-gene-273.<br>47,<br>VaccDscf30-<br>snap-gene-127.<br>34,<br>VaccDscf32-<br>processed-gene<br>-84.20,<br>VaccDscf42-<br>processed-gene<br>-185.4 | 9,<br>VaccDscf<br>15-augustus<br>-gene-332.3<br>1,<br>VaccDscf<br>15-augustus<br>-gene-315.3<br>3,<br>VaccDscf<br>24-augustus<br>-gene-73.38 |                                             |                                         |     |
| <i>Vitis vinifera</i> L. <sup>6</sup> | GSVIVT01<br>008234001 | GSVIVT01<br>036449001                                                    | GSVIVT01<br>011962001 | <i>RADL4</i> :<br>GSVIVT01<br>009723001;<br><i>RADL2</i> : | <i>RAD</i> :<br>GSVIVT01031<br>975001                                                                                                                                                       | <i>DIV</i> :<br>GSVIVG01<br>024794001                                                                                                        | <i>DIVL2</i> :<br>GSVIVG<br>0103400<br>1001 | <i>DIVL3</i> :<br>GSVIVG01<br>016370001 | N/A |

|  |  |  |  |                                                                                                               |  |  |  |  |  |
|--|--|--|--|---------------------------------------------------------------------------------------------------------------|--|--|--|--|--|
|  |  |  |  | GSVIVT01<br>018944001;<br><i>RADLI</i> :<br>GSVIVT01<br>031982001;<br><i>RADL3</i> :<br>GSVIVT01<br>009716001 |  |  |  |  |  |
|--|--|--|--|---------------------------------------------------------------------------------------------------------------|--|--|--|--|--|

\*RAD1 and RAD 3 are not supported as distinct groups.

<sup>1</sup>All *R. delavayi* sequences obtained from Zhang et al. 2017 at <http://gigadb.org/dataset/100331>. Genomic scaffold and gene ID, if predicted, given.

<sup>2</sup>All *R. simsii* sequences obtained from Yang et al. 2020 at <http://bioinfor.kib.ac.cn/RPGD/index.html>. Genomic scaffold and gene ID, if predicted, given.

<sup>3</sup>All *R. williamsianum* sequences obtained from Soza et al. 2019 at <https://genomevolution.org/coge/GenomeInfo.pl?gid=59084>. Genomic scaffold and gene ID, if predicted, given.

<sup>4</sup>All *A. chinensis* sequences obtained from Wu et al. 2019 at <http://kiwifruitgenome.org/organism/5>. Genomic scaffold and gene ID, if predicted, given.

<sup>5</sup>*A. majus* sequences obtained from GenBank or Li et al. 2019 at <http://bioinfo.sibs.ac.cn/Am>. Genomic scaffold and gene ID, if predicted, given.

<sup>6</sup>All sequences obtained from Phytozome at <https://phytozome.jgi.doe.gov/pz/portal.html>.

<sup>7</sup>All *M. grandiflora* sequences obtained from 1,000 Plants (Carpenter et al. 2019, Leebens-Mack et al. 2019) at China National Gene Bank, <https://db.cngb.org>.

<sup>8</sup>All *V. corymbosum* sequences obtained from Colle et al. 2019 at <https://www.vaccinium.org>. Genomic scaffold and gene ID, if predicted, given.

**Supplementary Table S3. Primer sequences and thermal cycling conditions used in this study.**

| Primer                                | Sequence                       | Annealing Temperature (C) | Extension Time (s) | Purpose            |
|---------------------------------------|--------------------------------|---------------------------|--------------------|--------------------|
| <b>CYC2</b>                           |                                |                           |                    |                    |
| RhCYC2A_StartF2                       | 5'-ATGWTCTCTTCAACCAMYAAYGS-3'  | 62                        | 60                 | Ingroup PCR        |
| RhCYC2A_StopR                         | 5'-GTTACCAYTGGCTGWAGATGTTGC-3' | 62                        | 60                 | Ingroup PCR        |
| RhCYC2_TCPF                           | 5'-GCACAAGCACAGYAAGATYT-3'     | 52                        | 30                 | Outgroup PCR       |
| RhCYC2_RR                             | 5'-CTCTCTHGCYYTTTRCCCTAGA-3'   | 52                        | 30                 | Outgroup PCR       |
| IDT ReadyMade™ Anchored Oligo dT (20) | 5'-TTTTTTTTTTTTTTTTTTTTTV-3'   | 45/55                     | 180                | 3' RACE            |
| Rbey_CYC2_3RACE_F1                    | 5'-TTCTTCSTCCAGTACCACTC-3'     | 45/55                     | 180                | 3' RACE            |
| Rbey_CYC2_3RACE_F2                    | 5'-YAWGCTAGGGTTCGAGAAAG-3'     | 45/55                     | 180                | 3' RACE            |
| <i>RhCYC2.1</i>                       |                                |                           |                    |                    |
| Rbey_CYC2_3RACE_intF                  | 5'-TCTACAGCCAATGGTGACAT-3'     | 50                        | 240                | 3' RACE sequencing |
| Rbey_CYC2.1B_RT_F                     | 5'-CGCTGGCAAGTTCTTCGATCTT-3'   | 68                        | 30                 | RT-PCR             |
| Rbey_CYC2.1B_RT_F2                    | 5'-GGTGAACCCAATGGTGAAA-3'      | 60                        | 90                 | 3' UTR PCR         |
| Rbey_CYC2.1_RT_R                      | 5'-GGCCGGCTCAAGAGTTTT-3'       | 68, 60                    | 30, 90             | RT-PCR, 3' UTR PCR |
| Rbey_CYC2.1_intF                      | 5'-GAGTGACGTGGATCAAGTAT-3'     | 50                        | 240                | 3' UTR sequencing  |
| Rbey_CYC2.1_intF2                     | 5'-GCTATTGAGCCAAAGGCCTC-3'     | 50                        | 240                | 3' UTR sequencing  |
| Rbey_CYC2.1_intR                      | 5'-TCCTAGGGAGAGAGAGAGAG-3'     | 50                        | 240                | 3' UTR sequencing  |
| Rbey_CYC2.1_intR2                     | 5'-TCACAACCGTAAACACGATC-3'     | 50                        | 240                | 3' UTR sequencing  |

|                   |                                 |        |        |                    |
|-------------------|---------------------------------|--------|--------|--------------------|
| Rtax_CYC2.1_RT_F2 | 5'-AAGCCGGTGAACCCAATGGT-3'      | 64     | 30     | RT-PCR             |
| Rtax_CYC2.1_RT_R2 | 5'-GACTTTACACCACCACTYGAG-3'     | 64     | 30     | RT-PCR             |
| <i>RhCYC2.2</i>   |                                 |        |        |                    |
| Rbey_CYC2.2_F     | 5'-ATGGTGTAAGGGGAGTACTCT-3'     | 64     | 90     | 3' UTR PCR         |
| Rbey_CYC2.2_RT_F2 | 5'-CAACTTGGAGGATGGAGCAT-3'      | 65     | 30     | RT-PCR             |
| Rbey_CYC2.2_RT_R2 | 5'-GCCTACCCGTAACCCAAAA-3'       | 65, 64 | 30, 90 | RT-PCR, 3' UTR PCR |
| Rtax_CYC2.2_RT_F  | 5'-CTTTTCGGCATGGTGGTTTC-3'      | 64     | 30     | RT-PCR             |
| Rtax_CYC2.2_RT_R  | 5'-GCTGATACCACTTGATCACTTCC-3'   | 64     | 30     | RT-PCR             |
| <i>RhCYC2.3</i>   |                                 |        |        |                    |
| Rbey_CYC2.3_RT_F  | 5'-CCTGACCGACACCCTTTT-3'        | 65     | 30     | RT-PCR             |
| Rbey_CYC2.3_RT_R  | 5'-CAGCAGCCCTATCTTTAAGT-3'      | 65     | 30     | RT-PCR             |
| Rtax_CYC2.3_RT_F  | 5'-GTCGATCGAAACGGCTCGCAAGTTC-3' | 66     | 30     | RT-PCR             |
| Rtax_CYC2.3_RT_R  | 5'-ATGCAGCAGCCCTATCTTTAAGTAA-3' | 66     | 30     | RT-PCR             |
| <i>RhCYC2.4</i>   |                                 |        |        |                    |
| Rbey_CYC2.4a_RT_F | 5'-TCCAAGTTGAAGCGATCTCC-3'      | 67     | 90     | 3' UTR PCR         |
| Rbey_CYC2.4c_RT_F | 5'-AGGTTCTGTTGTGGGCATTA-3'      | 67     | 30     | RT-PCR             |
| Rbey_CYC2.4c_RT_R | 5'-TAGCCAGAGAGCCAAACAAA-3'      | 67     | 30, 90 | RT-PCR, 3' UTR PCR |
| Rtax_CYC2.4_3utrF | 5'-GACACAGAAAGATAGGACTGCT-3'    | 58     | 90     | 3' UTR PCR         |
| Rtax_CYC2.4_3utrR | 5'-CAAGAGGTAATATTGCGGCAG-3'     | 58     | 90     | 3' UTR PCR         |
| Rtax_CYC2.4_RT_F  | 5'-AAGAAGGCCGCGAAGAAG-3'        | 66     | 30     | RT-PCR             |
| Rtax_CYC2.4_RT_R  | 5'-AGCAGTCCTATCTTTCTGTGTC-3'    | 66     | 30     | RT-PCR             |

|                      |                              |                        |         |                     |
|----------------------|------------------------------|------------------------|---------|---------------------|
| <i>RhCYC2.5</i>      |                              |                        |         |                     |
| Rbey_CYC2.5_3RACE_F2 | 5'-TCAGGGACCAATATTGAAGGT-3'  | 45/55, 66              | 180, 90 | 3' RACE, 3' UTR PCR |
| Rbey_CYC2.5c_3RACE_R | 5'-ATCATGGTACATCGGCACTA-3'   | 66                     | 90      | 3' UTR PCR          |
| Rbey_CYC2.5_intF     | 5'-ATACGAAAATGGCAGTGTCT-3'   | 50                     | 240     | 3' UTR sequencing   |
| Rbey_CYC2.5_intR     | 5'-CCAAGACAACAAAACACCTC-3'   | 50                     | 240     | 3' UTR sequencing   |
| Rbey_CYC2.5_RT_F     | 5'-CGAGAAACCAAGAAGCCAG-3'    | 65                     | 30      | RT-PCR              |
| Rbey_CYC2.5_RT_R     | 5'-ACCTTCAATATTGGTCCCTGA-3'  | 65                     | 30      | RT-PCR              |
| <b>RAD2</b>          |                              |                        |         |                     |
| <i>RhRAD2.1</i>      |                              |                        |         |                     |
| RhRADcopy1_F1        | 5'-ACGTCCTCCCAAGGCTCTG-3'    | 67                     | 35      | PCR                 |
| RhRADcopy1_R1        | 5'-GGTCTTGTAGTCAGGAAAGGG-3'  | 67                     | 35      | PCR                 |
| RhRADcp1_fwd_rtPCR   | 5'-ACCATCTACTCTACTTTCCG-3'   | 56 (Rtax) or 61 (Rbey) | 30      | RT-PCR              |
| RhRADcp1_rev2_rtPCR  | 5'-CCTTTGCTTCTCTTCACTAG-3'   | 56 (Rtax) or 61 (Rbey) | 30      | RT-PCR              |
| <i>RhRAD2.2</i>      |                              |                        |         |                     |
| RhRADcopy2_F1        | 5'-ATGGCATCAATGTCTTCCG-3'    | 67                     | 35      | PCR                 |
| RhRADcopy2_R1        | 5'-AGTTCTTGTAGTTTGGATAGG-3'  | 67                     | 35      | PCR                 |
| RhRADcp2_fwd1_rtPCR  | 5'-CCTTCTCACTCTACCGAAACAT-3' | 56 (Rtax) or 61 (Rbey) | 30      | RT-PCR              |
| RhRADcp2_rev1_rtPCR  | 5'-CCTTGGTTCATCACTTCATCT-3'  | 56 (Rtax) or 61 (Rbey) | 30      | RT-PCR              |
| <b>DIV1</b>          |                              |                        |         |                     |
| <i>RhDIV1.1</i>      |                              |                        |         |                     |
| RhDIV_LG03_F1        | 5'-ATGAGGTGGGGAATGGAGATTC-3' | 64                     | 35      | PCR                 |
| RhDIV_LG03_R1        | 5'-CTGACTTGTGCTCTTCTTCAG-3'  | 64                     | 35      | PCR                 |

|                               |                               |                        |          |                 |
|-------------------------------|-------------------------------|------------------------|----------|-----------------|
| RhDIVlg03_fwd2                | 5'-GCTCCTCTGCCTTCTCTTG-3'     | 61 (Rtax) or 63 (Rbey) | 30       | RT-PCR          |
| RhDIVlg03_rev1                | 5'-GGAAGAAGCACTATTATACCACG-3' | 61 (Rtax) or 63 (Rbey) | 30       | RT-PCR          |
| <i>RhDIV1.2</i>               |                               |                        |          |                 |
| RhDIV_LG04_F1                 | ATGGAAATTCTGTCGCCTGCATC       | 62                     | 35       | PCR             |
| RhDIV_LG04_R1                 | CCAACTTACTTATGCTCTTCTTCTG     | 62                     | 35       | PCR             |
| RhDIVlg04_fwd1                | 5'-GCTGTGAGGTGGGTTTTCC-3'     | 63 (Rbey), 66 (Rtax)   | 30       | RT-PCR          |
| RhDIVlg04_rev1                | 5'-CGGGAACCACTGTACCAAG-3'     | 63 (Rbey), 66 (Rtax)   | 30       | RT-PCR          |
| <b><i>ACT5</i></b>            |                               |                        |          |                 |
| DN129728_c6_g2_i3_Fwd_primer3 | 5'-CGGGGTTGGATGAAATGGCT-3'    | 63 (Rtax) or 65 (Rbey) | 30       | RT-PCR          |
| DN129728_c6_g2_i3_Rev_primer3 | 5'-GCCAATCCTCACCTTCTCA-3'     | 63 (Rtax) or 65 (Rbey) | 30       | RT-PCR          |
| <b><i>EF1A</i></b>            |                               |                        |          |                 |
| RhEF1a_Yi_FWD                 | 5'-TGTCATCGATGCTCCTGGAC-3'    | 62                     | 30       | RT-PCR          |
| RhEF1a_REV                    | 5'-AGGGCCTCTTGGGTTCATAA-3'    | 62                     | 30       | RT-PCR          |
| <b>M13</b>                    |                               |                        |          |                 |
| M13*F                         | 5'-GTAAAACGACGGCCAGTGAAT-3'   | 55                     | 30 or 60 | Clone screening |
| M13*R                         | 5'-CAGGAAACAGCTATGACCATG-3'   | 55                     | 30 or 60 | Clone screening |
