# Supplementary material for: Gene Duplication and Differential Expression of Flower Symmetry Genes in Rhododendron (Ericaceae)
Source: MDPI journal article supplement (doi:10.3390/plants10101994), 2021-09-23
Supplement: s1 [file s1]

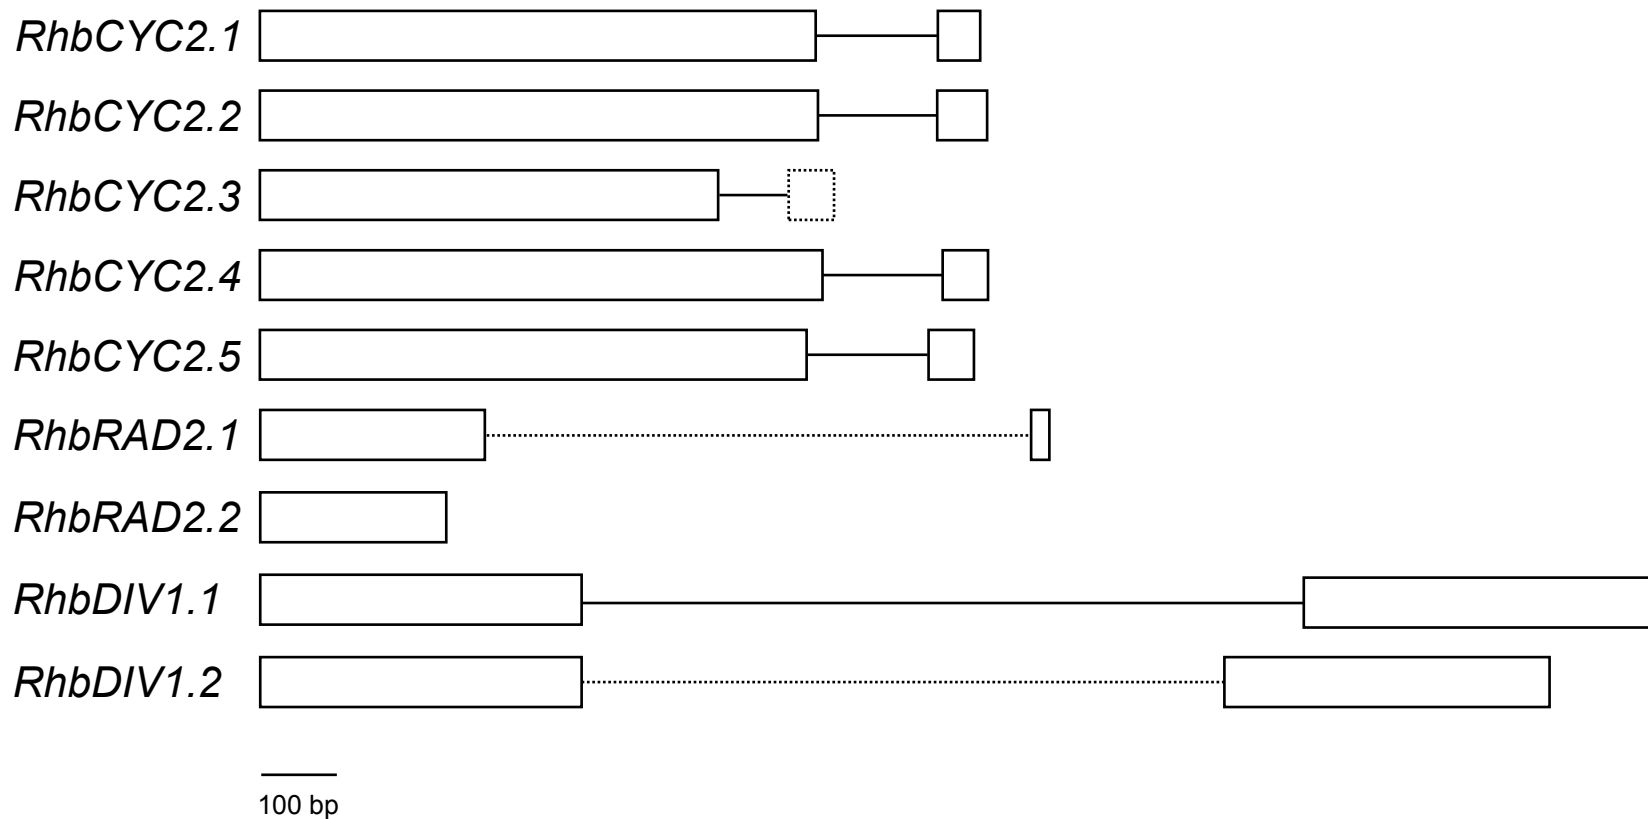

**Supplementary Figure S1. Gene structure of *Rhododendron beyerinckianum* CYCLOIDEA (CYC), RADIALIS (RAD), and DIVARICATA (DIV) orthologs.**

Exons denoted by rectangles; introns denoted by lines. Dotted lines indicate approximate length.
