# Supplementary material for: Gene Duplication and Differential Expression of Flower Symmetry Genes in Rhododendron (Ericaceae)
Source: MDPI journal article supplement (doi:10.3390/plants10101994), 2021-09-23
Supplement: s1 [file s1]

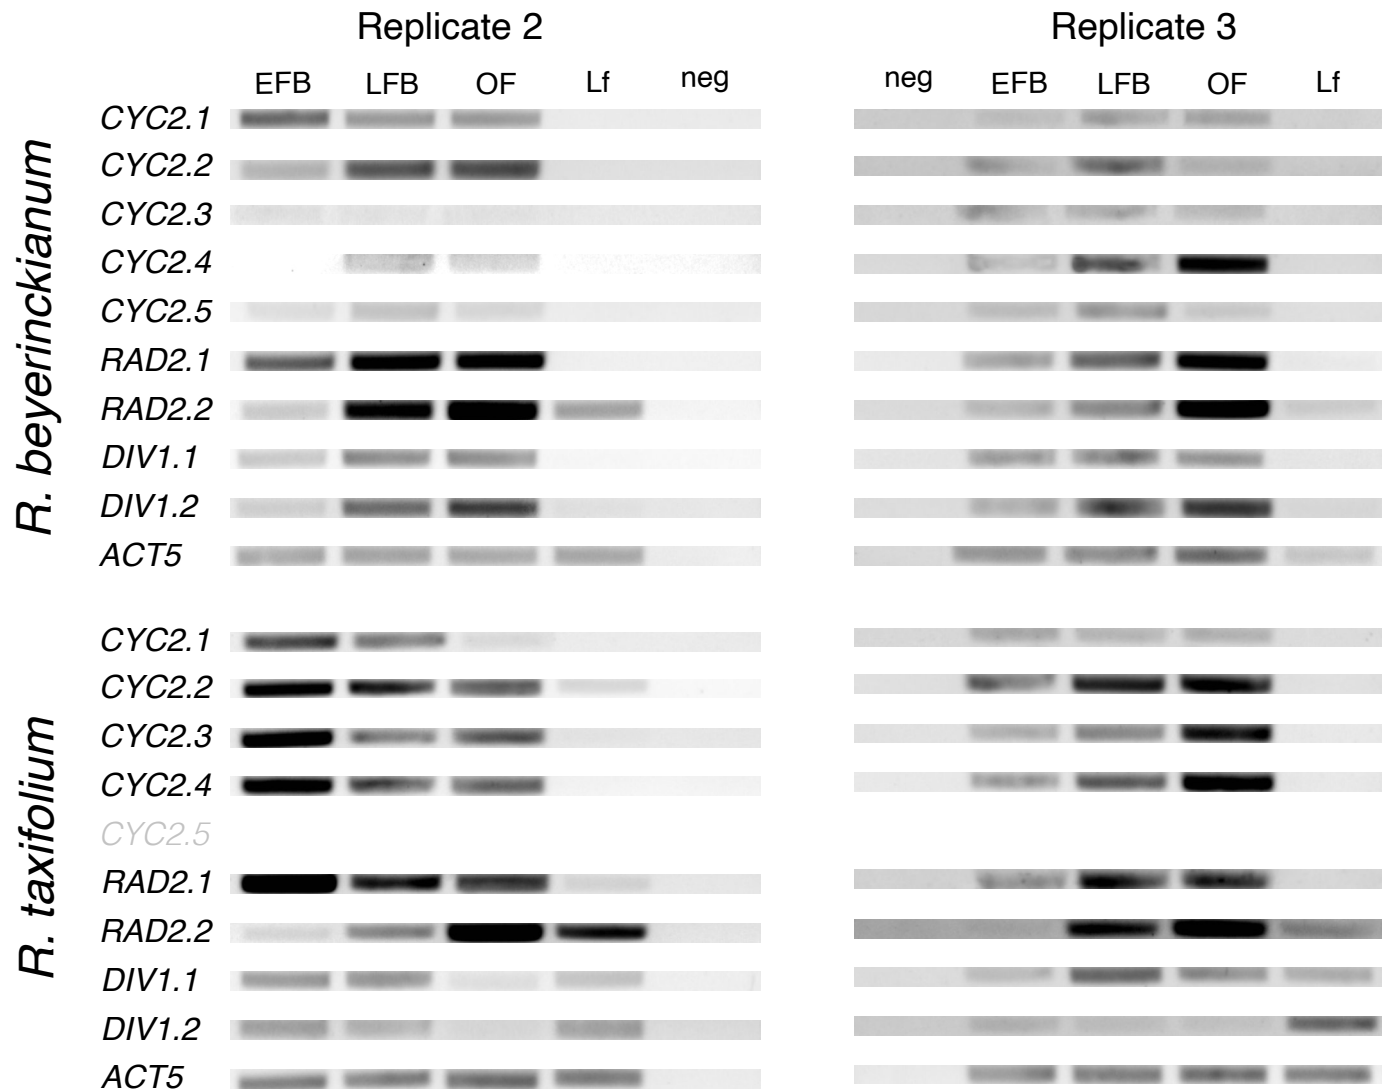

**Supplementary Figure S5. Gene expression of *CYCLOIDEA* (CYC), *RADIALIS* (RAD), and *DIVARICATA* (DIV) orthologs across floral developmental stages in two *Rhododendron* species with different floral symmetries.** Gene expression shown by RT-PCR for two additional replicates. Floral developmental stages sampled are early floral bud (EFB), late floral bud (LFB), and open flower (OF). Vegetative (Lf) and negative (neg) controls also shown. *ACTIN5* (ACT5) used as a reference gene. *R. beyerinckianum* is bilaterally symmetric; *R. taxifolium* is radially symmetric.
