# Supplementary material for: Gene Duplication and Differential Expression of Flower Symmetry Genes in Rhododendron (Ericaceae)
Source: MDPI journal article supplement (doi:10.3390/plants10101994), 2021-09-23
Supplement: s1 [file s1]

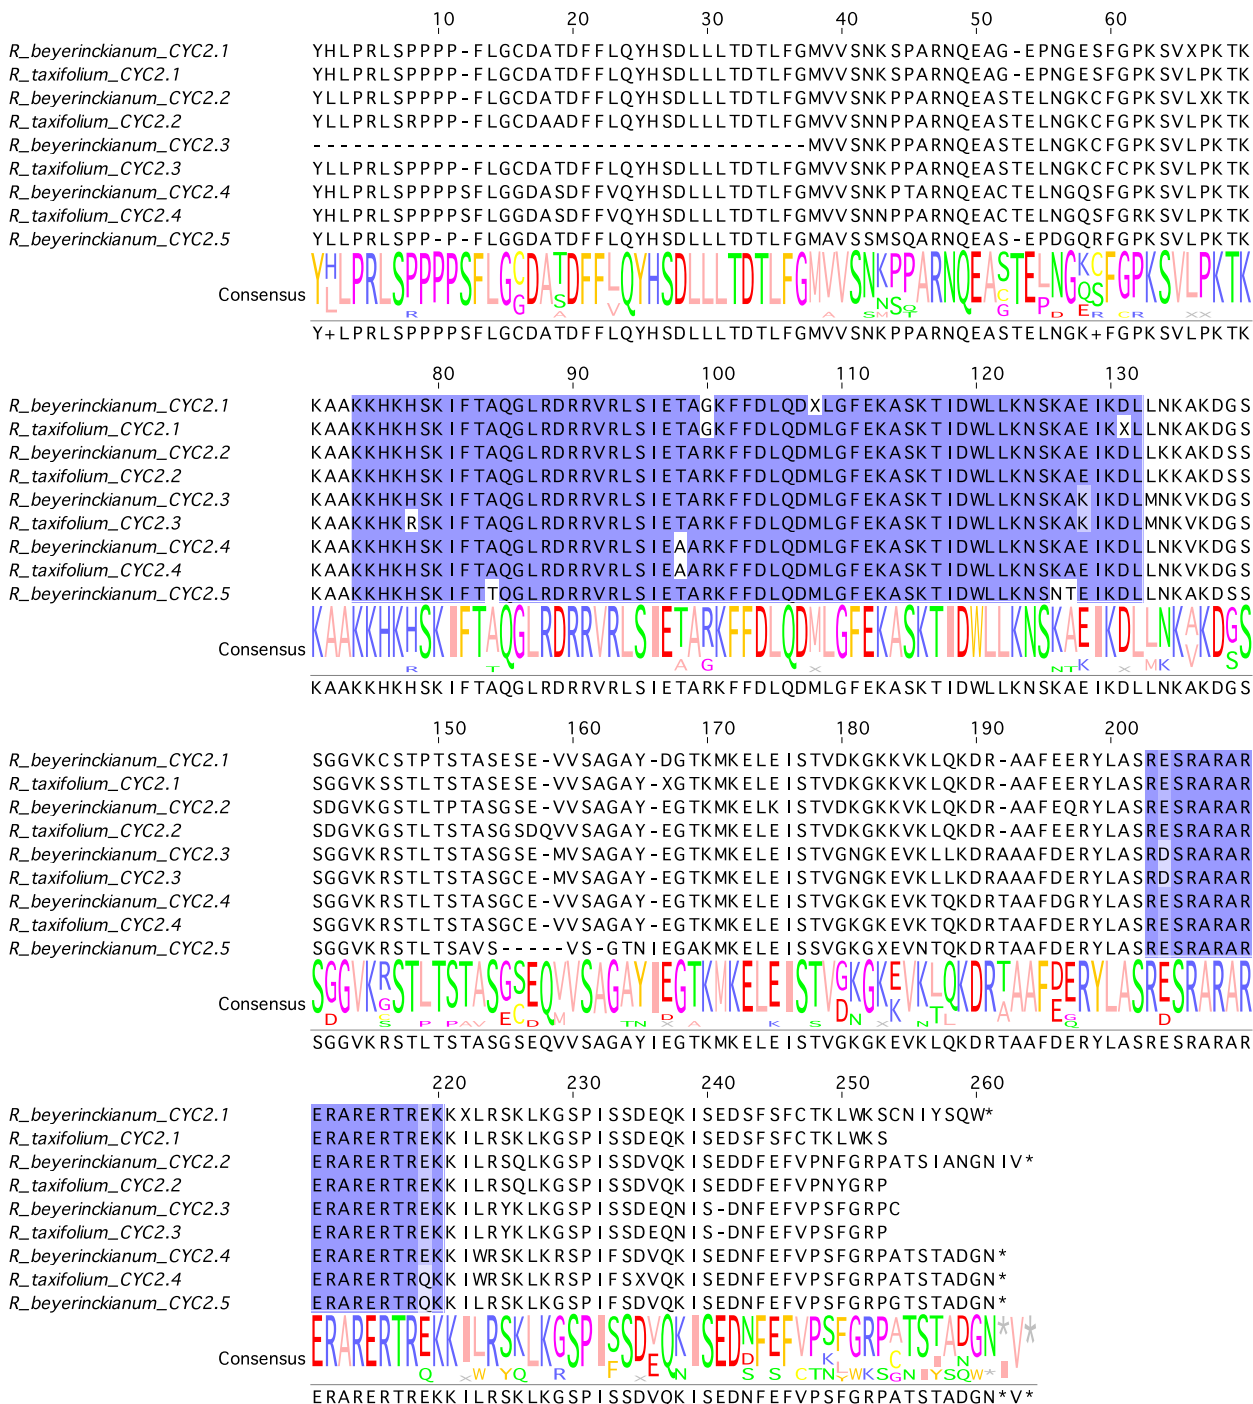

**Supplementary Figure S2. Protein alignment of *CYCLOIDEA* (*CYC*) orthologs from *Rhododendron* sect. *Schistanthe*.**  
TCP and R domains highlighted in blue, respectively, from left to right.
